# Supplementary material for: New hierarchical zinc silicate nanostructures and their application in lead ion adsorption
Source: Royal Society of Chemistry journal article supplement (doi:10.1039/c2jm15841h), 2012-01-01
Supplement: c2jm15841h.pdf [file c2jm15841h.pdf]

Supporting Information

## New hierarchical zinc silicate nanostructures and their application in lead ions adsorption

Jin Qu<sup>a,b</sup>, Chang-Yan Cao<sup>a</sup>, You-Li Hong<sup>b,c</sup>, Chao-Qiu Chen<sup>a,b</sup>, Pei-Ping Zhu<sup>c</sup>, Wei-Guo Song<sup>a,\*</sup>, Zi-Yu Wu<sup>c,d,\*</sup>

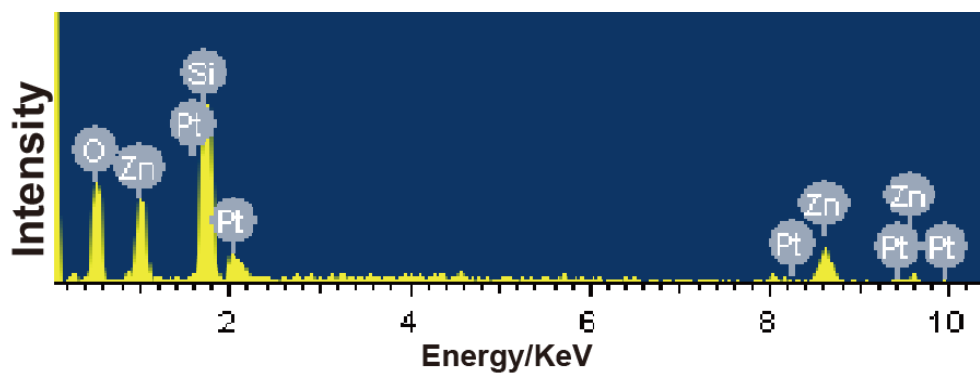

**Fig. S1** EDX analysis of the flower-like zinc silicate.

The signal of Pt was originated from the sputtered platinum to enhancing electronic conductivity of the sample for SEM measurement in the experiment.

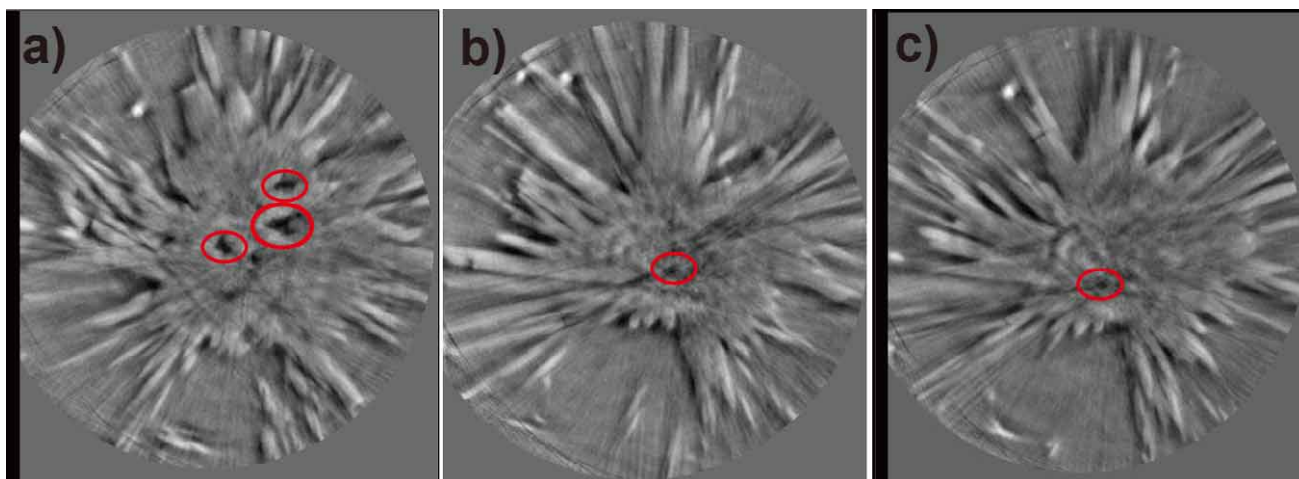

**Fig. S2** Reconstructed slice images of the urchin-like zinc silicate.

Black should be hollow which were marked in red circles.

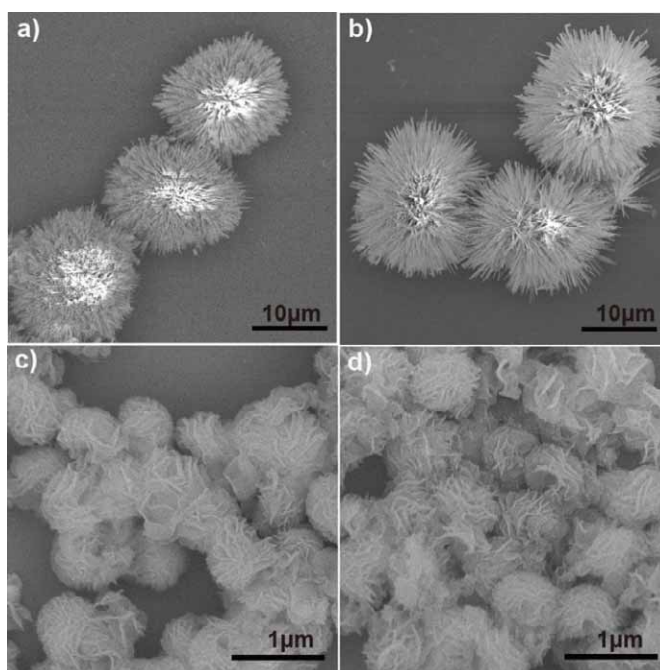

**Fig. S3** SEM images: a) Zn:Si molar ratio = 2:1 and c) Zn:Si molar ratio = 3:5 with  $\text{Zn}(\text{NO}_3)_2$  instead of  $\text{ZnCl}_2$ ; b) Zn:Si molar ratio = 2:1 and d) Zn:Si molar ratio = 3:5 with  $\text{Zn}(\text{Ac})_2$  instead of  $\text{ZnCl}_2$

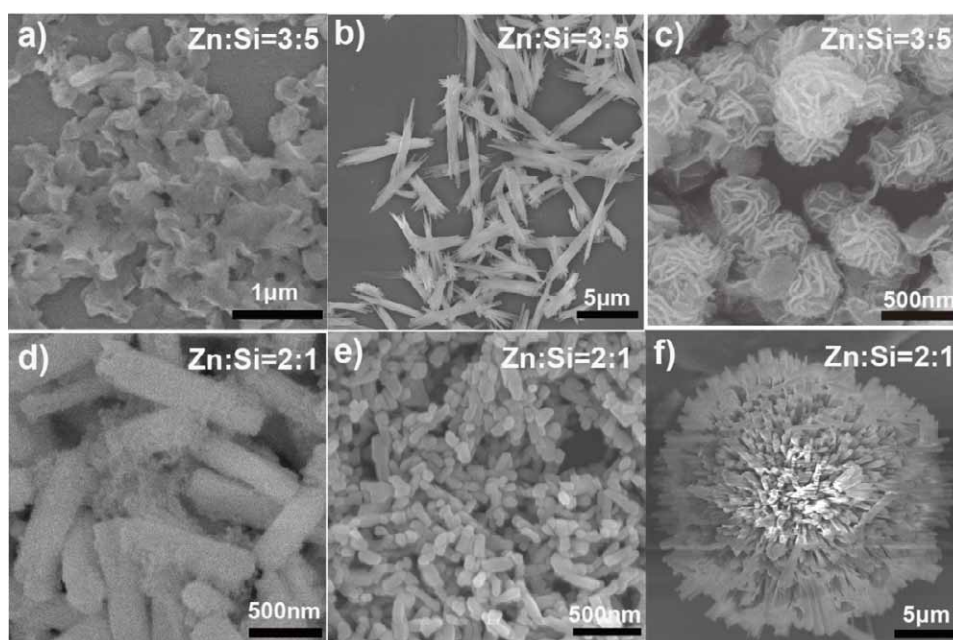

**Fig. S4** SEM images: without  $\text{NH}_3\cdot\text{H}_2\text{O}$ : a) Zn:Si molar ratio =3:5, d) Zn:Si molar ratio =2:1; without  $\text{NH}_4\text{Cl}$ : b) Zn:Si molar ratio =3:5, e) Zn:Si molar ratio =2:1; with  $\text{NH}_4\text{F}$  instead of  $\text{NH}_4\text{Cl}$ : c) Zn:Si molar ratio =3:5, f) Zn:Si molar ratio =2:1.

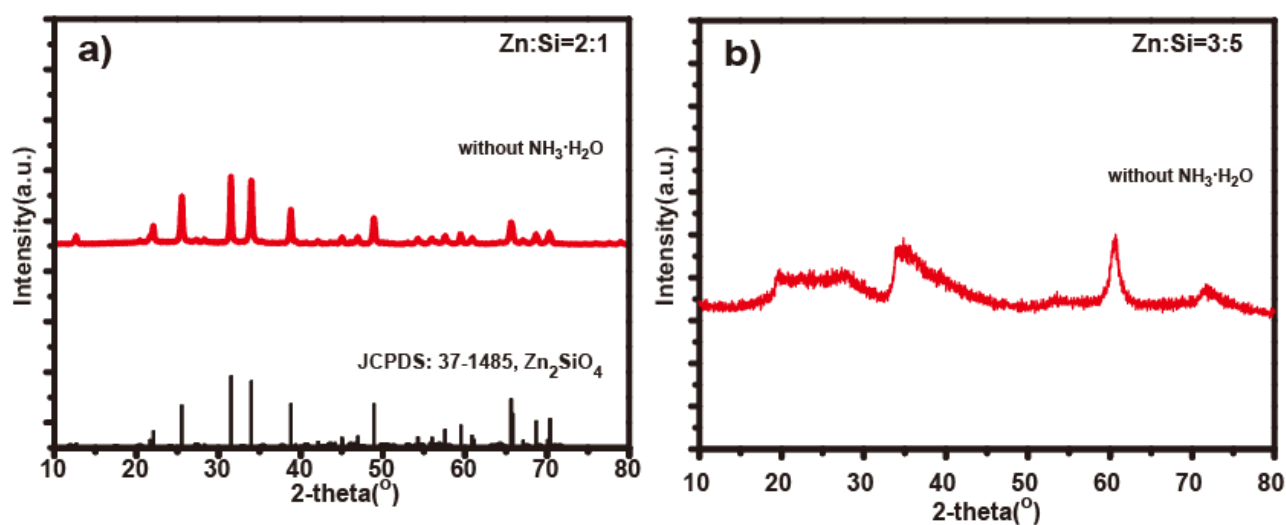

**Fig. S5** XRD patterns of the samples fabricated without  $\text{NH}_3\cdot\text{H}_2\text{O}$ : a) Zn:Si molar ratio =2:1, b) Zn:Si molar ratio =3:5.

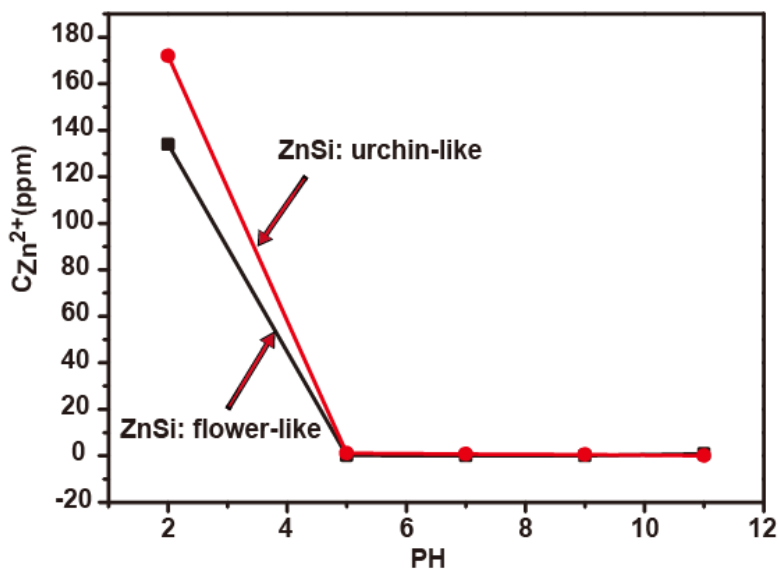

**Fig. S6** The concentration curves of Zn<sup>2+</sup> ions from as-prepared zinc silicates as a function of pH value.

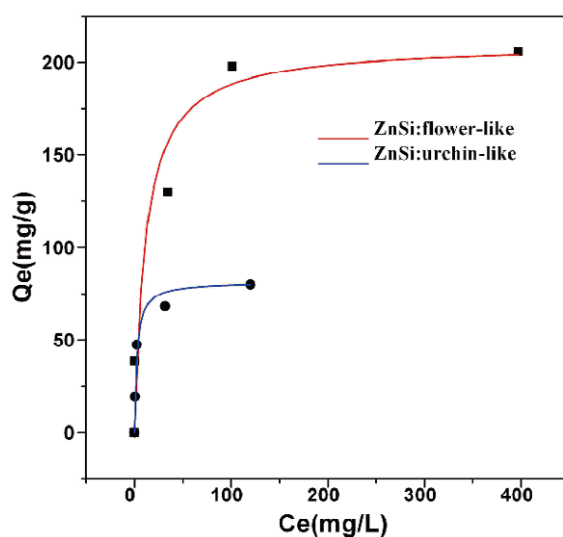

**Fig. S7** Adsorption isotherms of lead ions on the as-prepared zinc silicates at room temperature. C<sub>e</sub>: the equilibrium concentration of the Pb<sup>2+</sup> solution; Q<sub>e</sub>: the amount of Pb<sup>2+</sup> adsorbed at equilibrium.

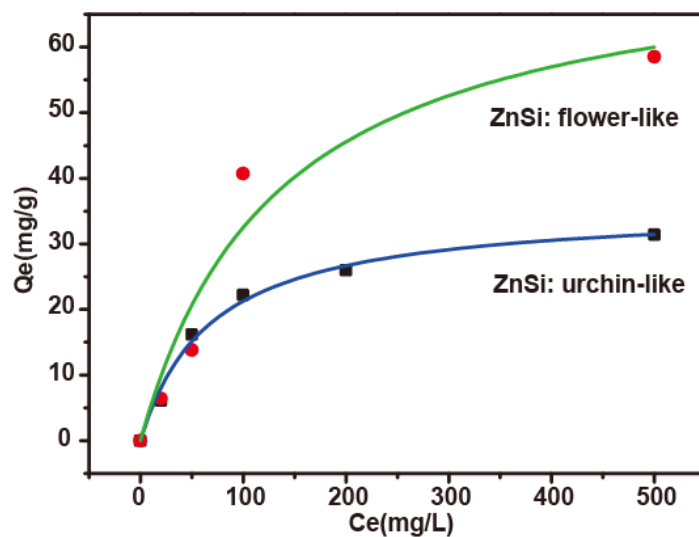

**Fig. S8** Concentration isotherms of zinc ions on the as-prepared zinc silicates at room temperature. Ce: the initial concentration of the  $Pb^{2+}$  solution; Qe: the amount of  $Zn^{2+}$  at equilibrium.
